# Supplementary material for: Stochastic chiral symmetry breaking process besides the deterministic one
Source: Royal Society of Chemistry journal article supplement (doi:10.1039/c7cp04674j), 2017-01-01
Supplement: c7cp04674j1.pdf [file c7cp04674j1.pdf]

## Supplementary Material

### 1. Linear analysis of Frank's model

The Frank's model presents two steady states (SS), shown in the table SM 1.1 with their respective eigenvalue.

Table SM.1.1 – Steady states and respective eigenvalues

| <i>SS</i>                                       | <i>Eigenvalues</i> |
|-------------------------------------------------|--------------------|
| $(0,0)$                                         | $(k_1, k_1)$       |
| $\left(\frac{k_1}{k_2}, \frac{k_1}{k_2}\right)$ | $(k_1, -k_1)$      |

As we can see, the steady state  $(0,0)$  is characterized by an unstable focus, whereas the steady state  $\left(\frac{k_1}{k_2}, \frac{k_1}{k_2}\right)$  is a saddle point. They are represented by the vector field in Figs. SM 1.1 and SM 1.2.

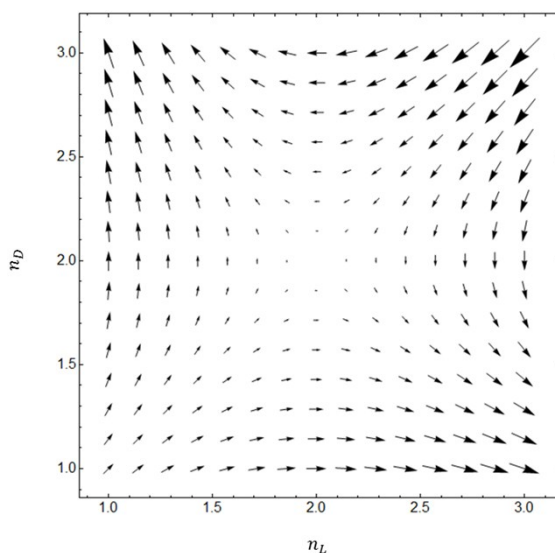

Figure.SM.1.1 – Saddle Point with  $k_1 = 1.0$  and  $k_2 = 0.5$ .

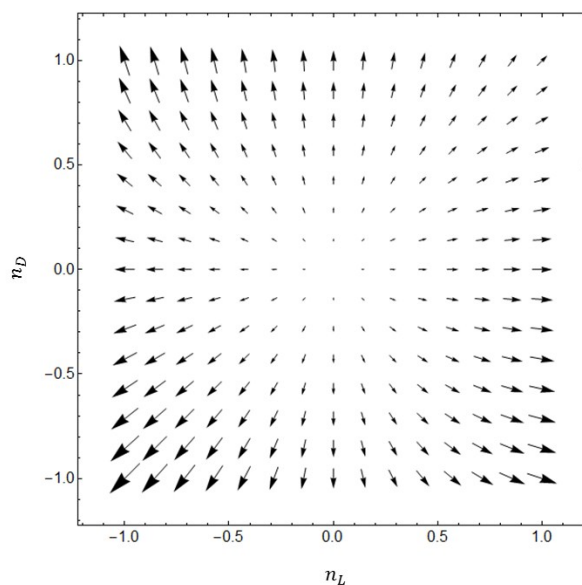

Figure.SM.1.2 – Unstable Focus, with  $\kappa_1 = 1.0$  and  $\kappa_2 = 0.5$ .

## 2. Probability function

Here, we show the procedure used to obtain the probability equation, Eq. (3).

Initially, we assume the following conditions for the Frank model:  $k_1 = k_2 = 0.5$ ,  $N = 100$ ,  $n_D = 1.1$  and  $n_L = 1.1 \times \left(1 + \frac{i}{N}\right)$ . For each  $i$ , where  $i$  is one of the integer number (0,1,2,4,6,8),  $10^7$  trajectories are numerically calculated, and the number of times that each enantiomer composed the final asymmetric state ( $\tau_{n_L}$  and  $\tau_{n_D}$ ) is computed. The probability of each enantiomer composing the final state is given by the total number of times each enantiomer formed the homoquiral state divided by the total number of trajectories calculated; in other words,  $P_L = \tau_{n_L}/10^7$  and  $P_D = \tau_{n_D}/10^7$ . The probabilities are shown in Table SM.2.1.

Table SM.2.1 – Number of trajectories ( $10^7$ ) and the probability of each enantiomer composing the final state associated to its enantiomeric excess for  $N = 100$

| $EE$ | $\tau_{n_L}$ | $\tau_{n_D}$ | $P_L$ | $P_D$ |
|------|--------------|--------------|-------|-------|
|------|--------------|--------------|-------|-------|

|       |         |         |           |           |
|-------|---------|---------|-----------|-----------|
| 0*    | 4963327 | 4962702 | 0.4963327 | 0.4962702 |
| 0.011 | 5610827 | 4389173 | 0.5610827 | 0.4389173 |
| 0.022 | 6173357 | 3826643 | 0.6173357 | 0.3826643 |
| 0.044 | 7205901 | 2794099 | 0.7205901 | 0.2794099 |
| 0.066 | 8075314 | 1924686 | 0.8075314 | 0.1924686 |
| 0.088 | 8747797 | 1252203 | 0.8747797 | 0.1252203 |

state is

\*Probability of racemic final  
 $P = (7.40 \pm 0.06) \times 10^{-3}$ .

The ratio of probabilities between the specie with initial enantiomeric deficiency by the

specie with initial enantiomeric excess ( $\frac{P_D}{P_L}$ ) as a function of the enantiomeric excess is shown in Fig.SM 2.1. These data were interpolated by an exponential function

$$\frac{\tau_{n_D}}{\tau_{n_L}} = \frac{P_D}{P_L} = e^{-\alpha EE},$$

where  $\alpha = 21.78$  was obtained.

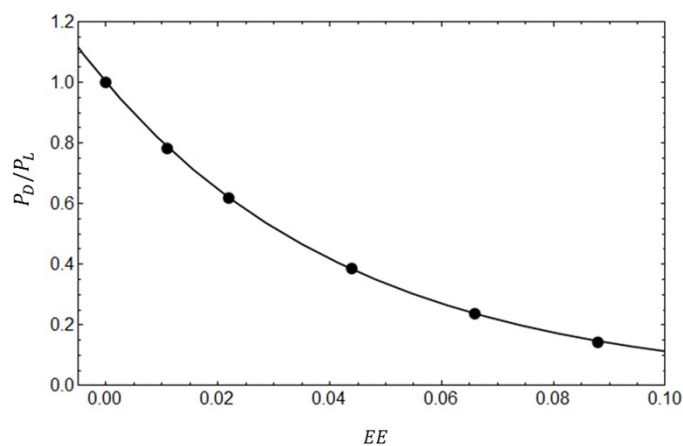

Figure.SM.2.1 –The ratio between probabilities  $\frac{P_D}{P_L}$  as a function of the enantiomeric excess is represented by dots and the exponential fitting of the data is represented by the solid line.

The function  $P_D = P(EE) = (e^{\alpha EE} + 1)^{-1}$  is represented in Fig. SM2.2.

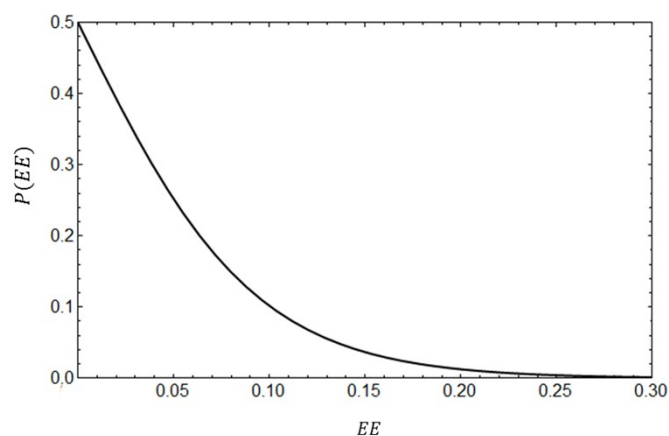

Figure.SM.2.2 – Probability that the enantiomer with initial enantiomeric deficiency will compose the final asymmetric state as a function of the initial EE of the other enantiomer.

### 3. Dependence of $\beta$ with $k_1$ and $k_2$

Table SM.3.1 – Dependence of  $\beta$  (bold numbers) with  $k_1$  and  $k_2$ .

| $k_1 \backslash k_2$ | 0.25         | 0.375        | 0.5          |
|----------------------|--------------|--------------|--------------|
| 0.1                  | <b>1.247</b> | <b>1.069</b> | <b>1.034</b> |
| 0.125                | <b>1.413</b> | <b>1.209</b> | <b>1.153</b> |
| 0.25                 | <b>1.947</b> | <b>1.621</b> | <b>1.585</b> |
| 0.375                | <b>2.254</b> | <b>2.006</b> | <b>1.806</b> |

|     |              |              |              |
|-----|--------------|--------------|--------------|
| 0.5 | <b>2.481</b> | <b>2.200</b> | <b>2.178</b> |
|-----|--------------|--------------|--------------|
